# Supplementary material for: Towards understanding the influence of seasons on low groundwater periods based on explainable machine learning
Source: Copernicus journal article supplement (doi:10.5194/hess-2023-284), 2023-12-18
Supplement: Supplementary file 1 [file hess-2023-284-supplement.pdf]

# **Assets - Towards understanding the influence of seasons on low groundwater periods based on explainable machine learning**

Andreas Wunsch<sup>1,2</sup>, Tanja Liesch<sup>2</sup>, Nico Goldscheider<sup>2</sup>

<sup>1</sup>Fraunhofer Institute of Optronics, System Technologies and Image Exploitation IOSB, Karlsruhe, Germany

<sup>2</sup>Karlsruhe Institute of Technology, Karlsruhe, Germany

*Correspondence to:* Andreas Wunsch (andreas.wunsch.edu@gmail.com)

Please check the following assets:

Supplement Information and Figures: <https://doi.org/10.5281/zenodo.10157406>

Model Code and Information: <https://github.com/AndreasWunsch/influence-of-seasons-on-low-GW-periods> or <https://doi.org/10.5281/zenodo.10156637>

Trained Models and modeling results: <https://doi.org/10.5281/zenodo.10156582>

Part of the groundwater data set: <https://doi.org/10.5281/ZENODO.4683879>
