# Supplementary material for: Towards understanding the influence of seasons on low groundwater periods based on explainable machine learning
Source: Copernicus journal article supplement (doi:10.5194/hess-2023-284), 2023-12-18
Supplement: Supplementary file [file hess-2023-284-RC2-supplement.pdf]

## **Review of: Towards understanding the influence of seasons on low groundwater periods based on explainable machine learning**

The paper gives interesting insights into seasonal patterns of groundwater levels, with the focus on low groundwater level time periods. I think the paper is well written and I have read it with interest. The authors use a machine learning method (LRP) that helps them to evaluate which impact the two meteorological inputs they use (precipitation and temperature) have on low groundwater periods within Germany. They have basically found that average temperature has a bigger impact on low groundwater levels than average precipitation, but single precipitation events show the strongest impact. They have found memory effects, like strong precipitation during the preceding winter, to be of less importance.

I think the motivation for this work is very clear, as we obviously want to deepen our understanding about low groundwater periods and the relevant inputs and timeframes behind them. The paper is well structured and concise and the figures are carefully designed and meaningful. The choice which figures are included in the paper and which are shared as supplementary material was made well and the supplementary material is useful and clearly structured. The title is appropriate and the language is good. The LRP method is presented in a plausible way, but I cannot give an in-depth evaluation on that, since I do not come from a machine learning research background. I think that the paper is a good contribution to HESS and recommend that it will be published after minor revisions, which I will elaborate on in the following. I will start with some general comments which include my most essential remarks and then I will get into detailed comments where I reference specific lines.

### General comments:

One key conclusion of this work is that temperature is on average more important than precipitation (stated in the abstract and lines 185 and 269). I do not fully understand where this conclusion comes from. I assume one could get to that conclusion from Figure 5, because values are more distributed along the y-axis than the x-axis? I do not think this is clearly stated within the paper (at least not in a way that reached me) and the sentence in line 185 “LRP identifies T as on average more important than P (thus T is on top of the plot)” confuses me. How does it identify T as more important on average? Could this maybe be expressed / quantified by a single value that is then given to the reader?

I think that the general claim that dry summers have a large impact on low-water periods and wet winters contribute less to these periods is supported by their findings. However, I think this should be relativized, since I would expect that the amount of impact of the preceding winter depends a lot on the catchment and specific location that is observed. Properties of the soil (including the vadose zone) and delayed release of water by other storages like snow could matter much more at different locations and for different water table depths (majority of the observation wells are at very shallow locations).

The term “importance value” is used sometimes within this work, but it is not explained. If it is the same as relevance score, I suggest sticking to one term. If not, I think it needs to be explained.

### Detailed comments:

Abstract: I think it should be stated that you use observations wells distributed over Germany and that they are mostly located in very shallow aquifers.

Lines 9-10: I think it should be stated that you use precipitation and temperature as input data.

Line 15: Writing “more important than precipitation” instead of “the more important variable” would improve understandability.

Lines 26-28: I disagree with this sentence. Groundwater levels play an important role when estimating recharge, but they do not represent recharge.

Lines 28-29: I suggest “recharge can be approximated by” instead of “recharge is”.

Lines 29-30: I suggest “changes in soil moisture and groundwater storage”.

Figure 1 - legend: Without the information in the brackets (n = 18) etc. and with the unit directly behind the number (e.g. < 3 m) I would have understood this legend quicker.

Figure 3 – caption: I suggest removing brackets around “at all 24 locations”.

Lines 165- 168: I agree and would like to add that higher temperatures in winter can also cause the snow storage to melt, which might also play a role with respect to the positive contribution of T.

Lines 172-174: If the model learns that conditions one year earlier are important, why does it learn that for fall, but not for winter?

Lines 177-179: I needed to reread this sentence many times, because of the second part of it. I think I understood it now and would recommend writing “it cannot be seen that higher T during dry periods lead to predominantly lower groundwater levels”. The way it was phrased before it did not make sense to me, because you always refer to water levels during the low-water period (JAS) in Figure 5 (at least that’s how I understood it).

Figure 5: I think it should be stated what we are looking at here (relevance score).

Figures 5 and 6: I think it should be clarified what exactly one dot represents (e.g. one dot per week and location). I think there should be actual values at the colorbar.

Line 211: Judging from this sentence, I assume that the values for the colorbars in Figure 7 should actually say  $\leq -0.06$  and  $\geq 0.06$ .

Lines 213-214: Wouldn’t this oppose the claim that P11 is a typical example for the whole dataset?

Lines 236-237: I find this concept of dry and wet low-water periods confusing. What is meant by a wet low-water period? Is it a comparably high GWL during the time period (JAS) or does the term wet refer to high precipitation? I think further clarification and maybe a different term could help. Maybe something like “most severe / least severe low-water period” instead of “driest / wettest low-water period”.

Figure 8: According to the lines previously referred to, the titles for d1 and e1 should be (if you stick to this term) “three driest low-water periods” and “three wettest low-water-periods”.

Line 246: Wouldn’t that be expected, because evapotranspiration depends on both temperature and water availability?

Conclusions – last paragraph: Another limitation is that all inputs other than P and T are neglected. I think this is also an advantage of the study, since it puts a clear focus on these two inputs, but it should still be mentioned, since the hydrologic cycle is very complex and a lot more things influence water tables other than P and T.
